# Supplementary material for: Preparation of surface self-concentration and contact-killing antibacterial coating through UV curing
Source: Royal Society of Chemistry journal article supplement (doi:10.1039/c5ra03881b), 2015-01-01
Supplement: c5ra03881b1.pdf [file c5ra03881b1.pdf]

## Electronic Supplementary Information

### Surface self-concentrating and contact-killing antibacterial coating with anti-fog capacity

Ren Liu, Junchao Zheng, Zhiquan Li, Jingcheng Liu and Xiaoya Liu\*

The Key Laboratory of Food Colloids and Biotechnology, Ministry of Education,  
School of Chemical and Material Engineering, Jiangnan University, Wuxi 214122,  
China

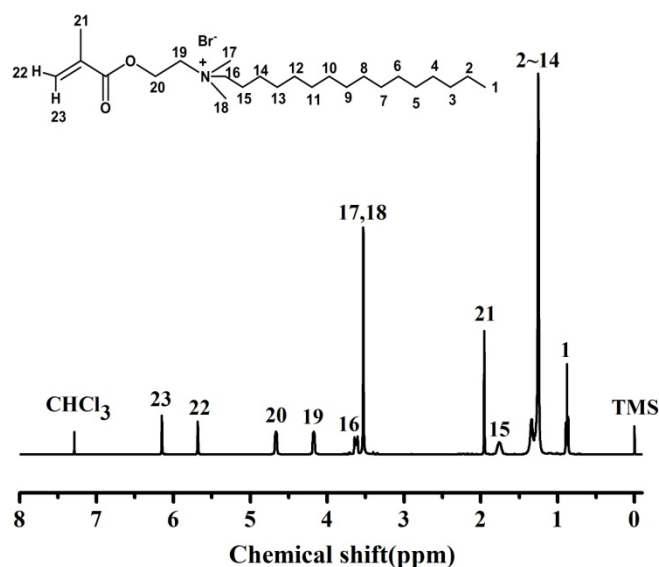

Figure S1. The <sup>1</sup>H-NMR spectrum of DMEAMA-HB(QAC).

Attenuated total reflectance Fourier transform infrared (ATR-FTIR): 2845–2920  
cm<sup>-1</sup> (saturated C–H stretching vibration), 1720.5 cm<sup>-1</sup> (C=O stretching vibration),

1634.8  $\text{cm}^{-1}$  (C=C stretching vibration), 720.9  $\text{cm}^{-1}$  ( $\text{CH}_2$ )<sub>n</sub> > 4 rocking vibration.

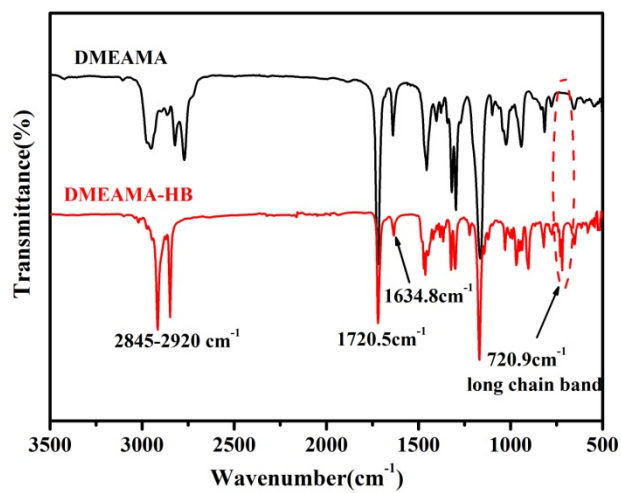

Figure S2. The FTIR spectra of DMEA and DMEAMA-HB(QAC)
